# Supplementary material for: SQUIRE 2.0 (Standards for QUality Improvement Reporting Excellence): Revised Publication Guidelines From a Detailed Consensus Process
Source: PubMed Central journal article supplement — Am J Med Qual. 2015 Nov;30(6):543–9. doi: 10.1177/1062860615605176 (PMC4620592; doi:10.1177/1062860615605176), 2015-11
Supplement: AJMQ605176_Appendix.pdf [file AJMQ605176_Appendix.pdf]

**Appendix. Name and affiliation of members of the SQUIRE 2.0 advisory group**

Davina Allen, Cardiff University, UK

Ross Baker, University of Toronto, Canada

Helen Crisp, Health Foundation, UK

Mary Dixon-Woods, University of Leicester, UK

Don Goldman, Institute for Healthcare Improvement, USA

Steve Goodman, Stanford University, USA

Leora Horwitz, New York University, USA

Pam Ironside, Indiana University, USA

Peter Margolis, University of Cincinnati, USA

Paul Miles, American Board of Pediatrics, USA

Shirley Moore, Case Western Reserve University, USA

Peter Pronovost, Johns Hopkins University, USA

Lisa Rubenstein, University of California Los Angeles, USA

Gwen Sherwood, University of North Carolina, USA

Kaveh Shojania, University of Toronto, Canada

Richard Thomson, Newcastle University, UK

Charles Vincent, Imperial College London, UK

Hub Wollersheim, Radboud University Medical Center, the Netherlands
